# Supplementary material
Source: publisher figshare collection journal article supplement (https://frontiersin.figshare.com/ndownloader/files/31356649)
Supplement: Supplementary file [file 31356649]

|          | mCSM server*                         | mCSM-NA*                    |                                      | PremPDI**                   |
|----------|--------------------------------------|-----------------------------|--------------------------------------|-----------------------------|
| Mutation | Predicted affinity change (kcal/mol) | Stability effect (kcal/mol) | Predicted affinity change (kcal/mol) | $\Delta\Delta G$ (kcal/mol) |
| H7Y      | -0.627 (destabilising)               | 0.077 (stabilising)         | 0.193                                | -0.08                       |
| D9H      | -0.089 (destabilising)               | -0.927 (destabilising)      | 1.544                                | -0.63                       |
| D9N      | -0.277 (destabilising)               | -0.895 (destabilising)      | 0.129                                | -0.39                       |
| S22R     | -0.0666 (destabilising)              | -0.45 (destabilising)       | 1.337                                | -0.18                       |
| N70T     | -1.523 (destabilising)               | -0.324 (destabilising)      | 0.929                                | 1.14 (deleterious)          |
| R75W     | -0.34 (destabilising)                | -0.785 (destabilising)      | -0.466 (reduced affinity)            | 0.2                         |
| G79R     | 0.149 (stabilising)                  | -1.373 (destabilising)      | 0.504                                | 0.25                        |

**Supplementary Figure 1. Predicted alterations in Banf1 DNA binding affinity ( $\Delta\Delta G$  (kcal/mol)).** Predictions were generated by the mCSM, mCSM-NA and PremPDI servers.

\*mCSM and mCSM-NA servers- predicted affinity change: A negative value corresponds to a mutation predicted as reducing affinity; while a positive value corresponds to a mutation predicted as increasing affinity.

\*\*PremPDI server-A positive and negative signs correspond to destabilizing and stabilizing mutations predicted to decrease and increase binding affinity correspondingly. PremPDI server classifies a mutation as deleterious if  $\Delta\Delta G$  is higher or equal to 1.10 kcal mol<sup>-1</sup>.

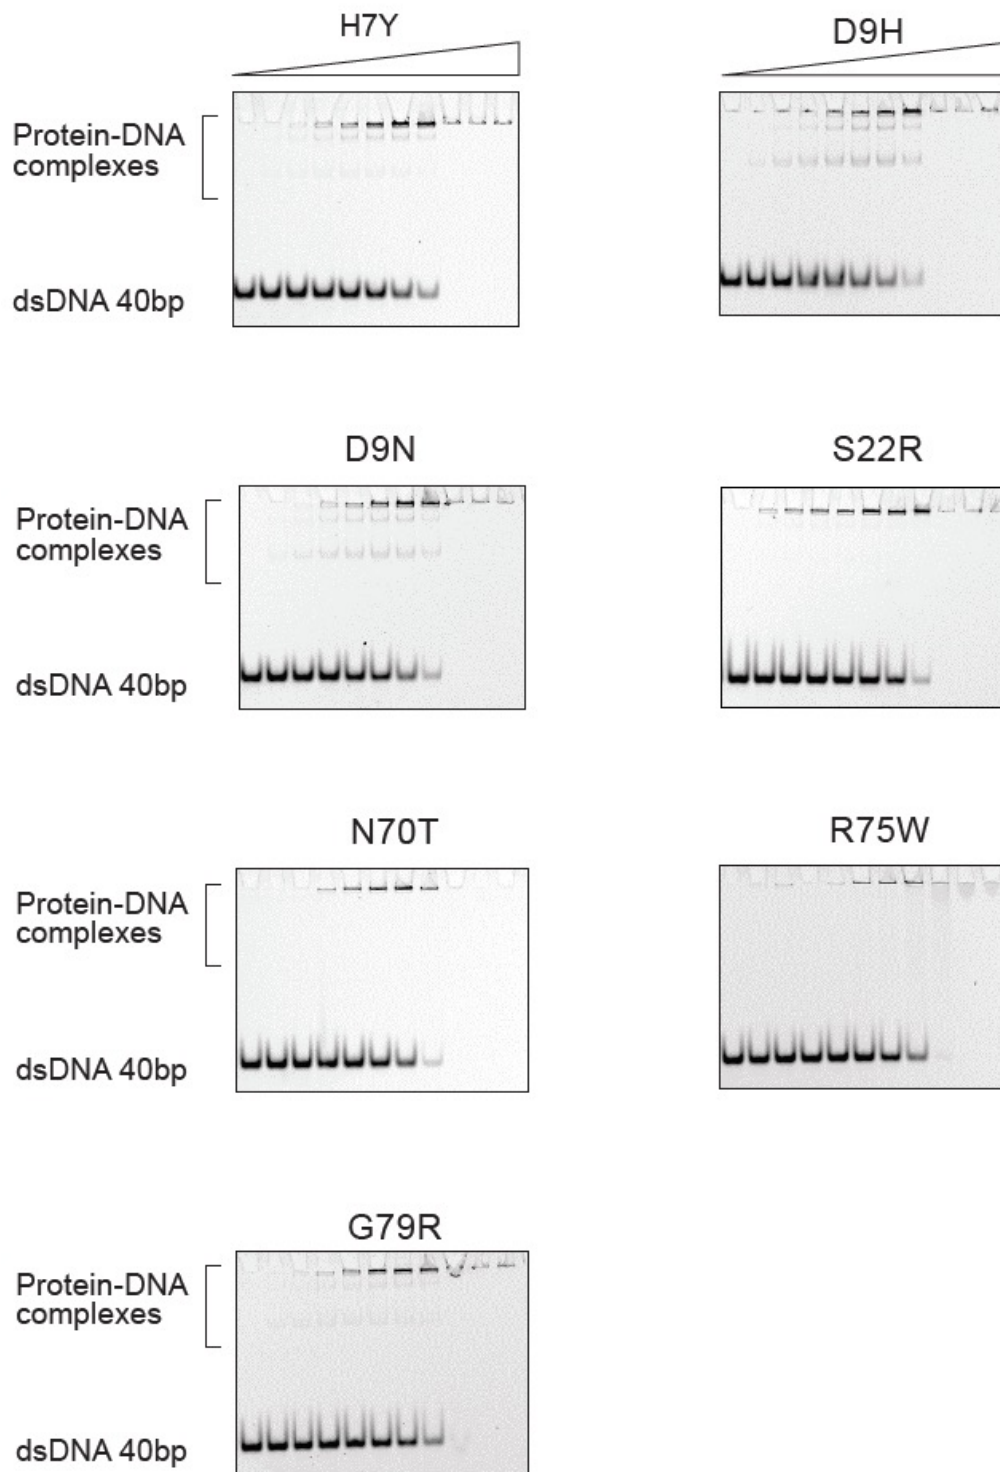

**Supplementary Figure 2. Banf1 variants display differing dsDNA binding affinities.** Representative Electrophoresis Mobility Shift Assays (EMSA) of Banf1 WT (0.5, 1.0, 2.0, 3.9, 7.8, 15.6, 31.3, 62.5, 125, 250 nM) binding to dsDNA of 40bp labelled with 5' Cy5. EMSA comparing percentage of Banf1 WT with Banf1 variant **(b)** H7Y, **(c)** D9H, **(d)** D9N, **(e)** S22R, **(f)** N70T, **(g)** R75W, **(h)** G79R binding to dsDNA.
